# Supplementary material for: The cytoplasmic domain of the AAA+ protease FtsH is tilted with respect to the membrane to facilitate substrate entry
Source: PubMed Central journal article supplement (PMC7949044; doi:10.1074/jbc.ra120.014739), 2020-11-23
Supplement: mmc1.pdf [file mmc1.pdf]

## SUPPORTING INFORMATION

### **The cytoplasmic domain of the AAA+ protease FtsH is tilted with respect to the membrane to facilitate substrate entry**

Vanessa Carvalho<sup>1#</sup>, Irfan Prabudiansyah<sup>1#</sup>, Lubomir Kovacic<sup>2#</sup>, Mohamed Chami<sup>2</sup>, Roland Kieffer<sup>1</sup>, Ramon van der Valk<sup>1</sup>, Nick de Lange<sup>1</sup>, Andreas Engel<sup>2\*</sup>, Marie-Eve Aubin-Tam<sup>1\*</sup>

<sup>1</sup>Department of Bionanoscience, Kavli Institute of Nanoscience, Delft University of Technology, Van der Maasweg 9, Delft 2629 HZ, the Netherlands

<sup>2</sup>BioEM lab, C-CINA, Center for Cellular Imaging and NanoAnalytics, Biozentrum, University of Basel, Mattenstrasse 26, 4058 Basel, Switzerland.

Running title: *Conformational flexibility of the full-length FtsH*

<sup>#</sup>These authors contributed equally to this work.

\*Corresponding authors: (Andreas Engel) andreas.engel@unibas.ch; (Marie-Eve Aubin-Tam) m.e.aubin-tam@tudelft.nl

## CONTENTS

**Figure S1. SEC-MALS analysis of AaFtsH.**

**Figure S2. Sequence alignment of the *E. coli* and *Aquifex aeolicus* FtsH full-length sequence.**

**Figure S3. Distance measurements between the cytosolic domain and the detergent micelle.**

**Figure S4. Inorganic phosphate release measurements.**

**Figure S5. Protease activity assay measurements.**

**Figure S6. SEC profiles of fractions 1 and 2 after purification and incubation in the protease activity assay buffer.**

**Figure S7. ~20 aa linker structure prediction**

**Figure S8. AaFtsH- $\Delta$ 20 mutant characterization.**

**Table S1. Data derived from SEC-MALS of AaFtsH**

**Table S2. Data derived from SEC-MALS of AaFtsH- $\Delta$ 20 mutant**

**Table S3. Primers used in this study**

**Table S4. FtsH image acquisition and image processing**

**Table S5. Dimensions of FtsH subunit**

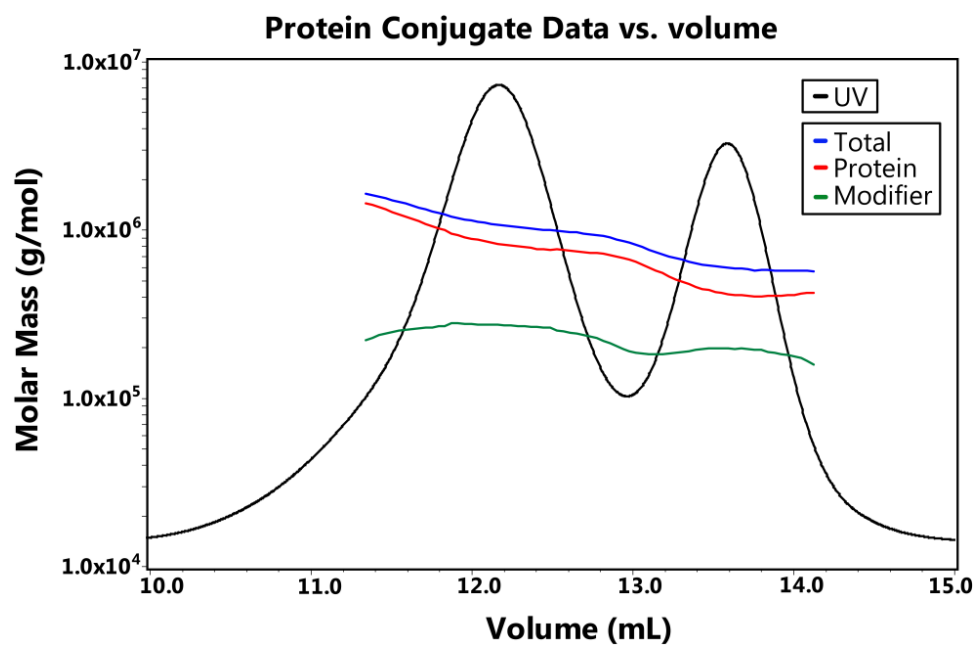

**Figure S1.** SEC-MALS analysis of AaFtsH. UV absorption chromatograms showing the distribution of the molar mass (g/mol) vs. retention volume (mL) for protein-detergent micelle. The calculated molar masses of protein, detergent micelle, and total of the protein-detergent micelle are shown in the supplementary Table S1.

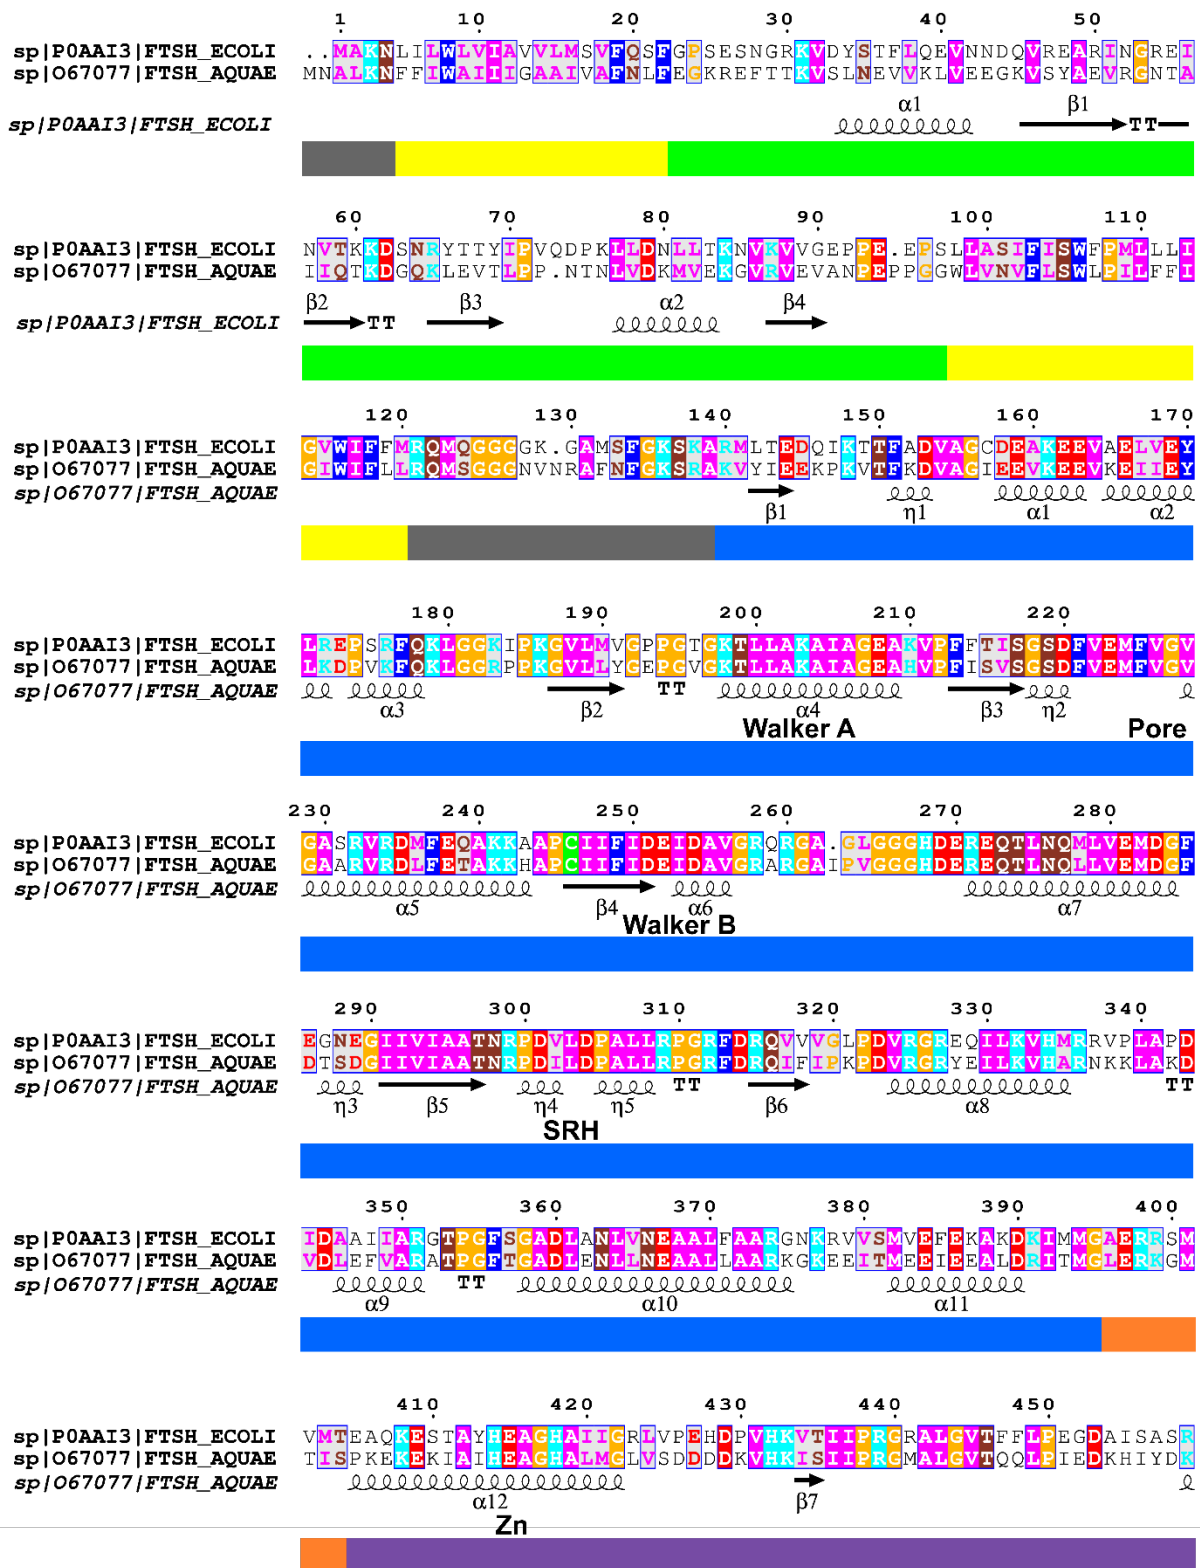



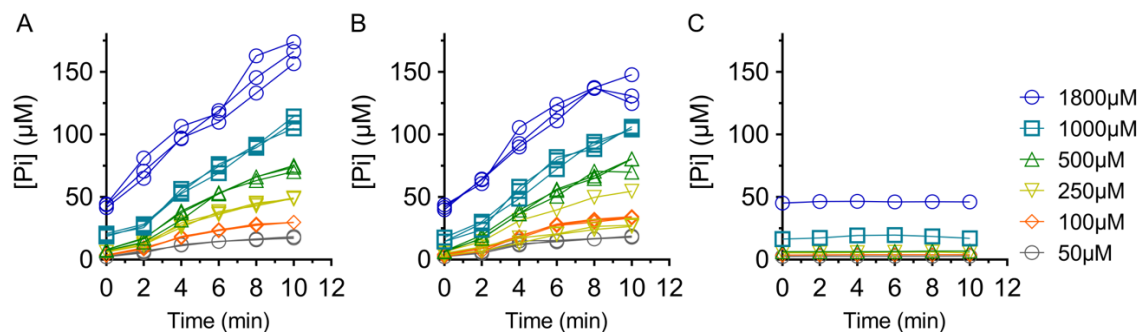

**Figure S4.** Inorganic phosphate release measurements. Free phosphate was measured using the Malachite Green assay kit for 0.25 µM of AaFtsH hexamer (A) and dodecamer (B) fractions incubated with different ATP concentrations for 10 min. C – The free phosphate measurements in absence of AaFtsH.

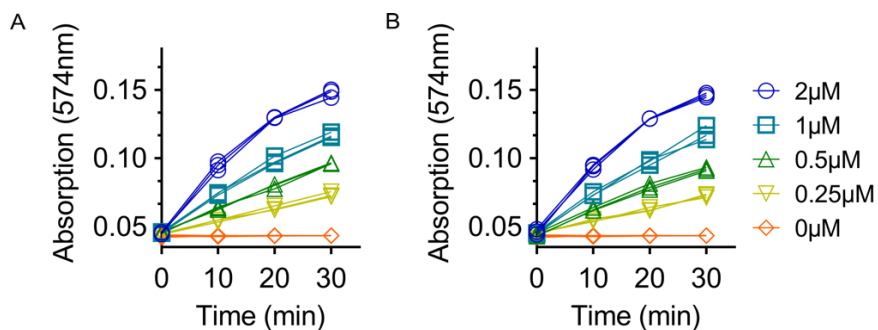

**Figure S5.** Protease activity assay measurements. Resorufin release was measured over 30 minutes for 50 µM of Resorufin labelled casein incubated with hexamer (A) and dodecamer fractions (B) at different concentrations.

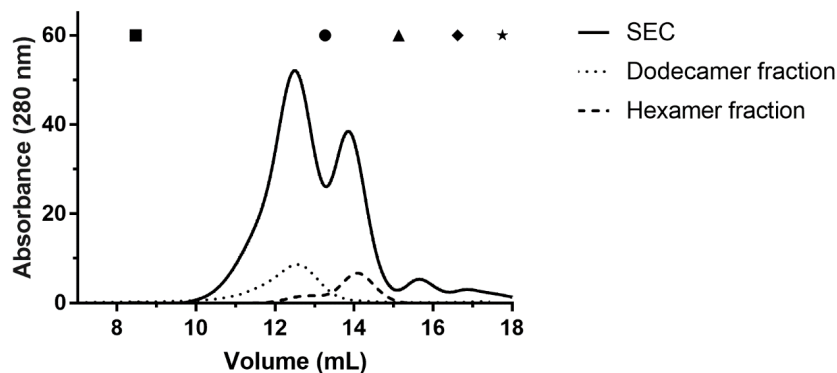

**Figure S6.** SEC profiles of fractions 1 and 2 after purification and incubation in the protease activity assay buffer. The original SEC profile for purification is shown as a solid line. The dotted lined profile corresponds to the re-running of the first fraction of the SEC, after incubation at 60 °C for 30 min in the protease activity assay buffer. The dashed lined profile corresponds to the re-running of the second fraction of the SEC, after incubation in the same conditions. Blue Dextran (■) used to calculate the void volume of the column (8.47 mL). The elution volumes of standard proteins used to estimate the molecular weight of the eluted fractions are shown on the top of the graph: (●) Tyroglobulin (MW: 669 kDa; Ve: 13.27 ml), (▲) Ferritin (MW: 440 kDa; Ve: 15.13 ml), (◆) Aldolase (MW: 158 kDa; Ve: 16.62 ml) and (★) Ovalbumin (MW: 44 kDa; Ve: 17.76 ml).

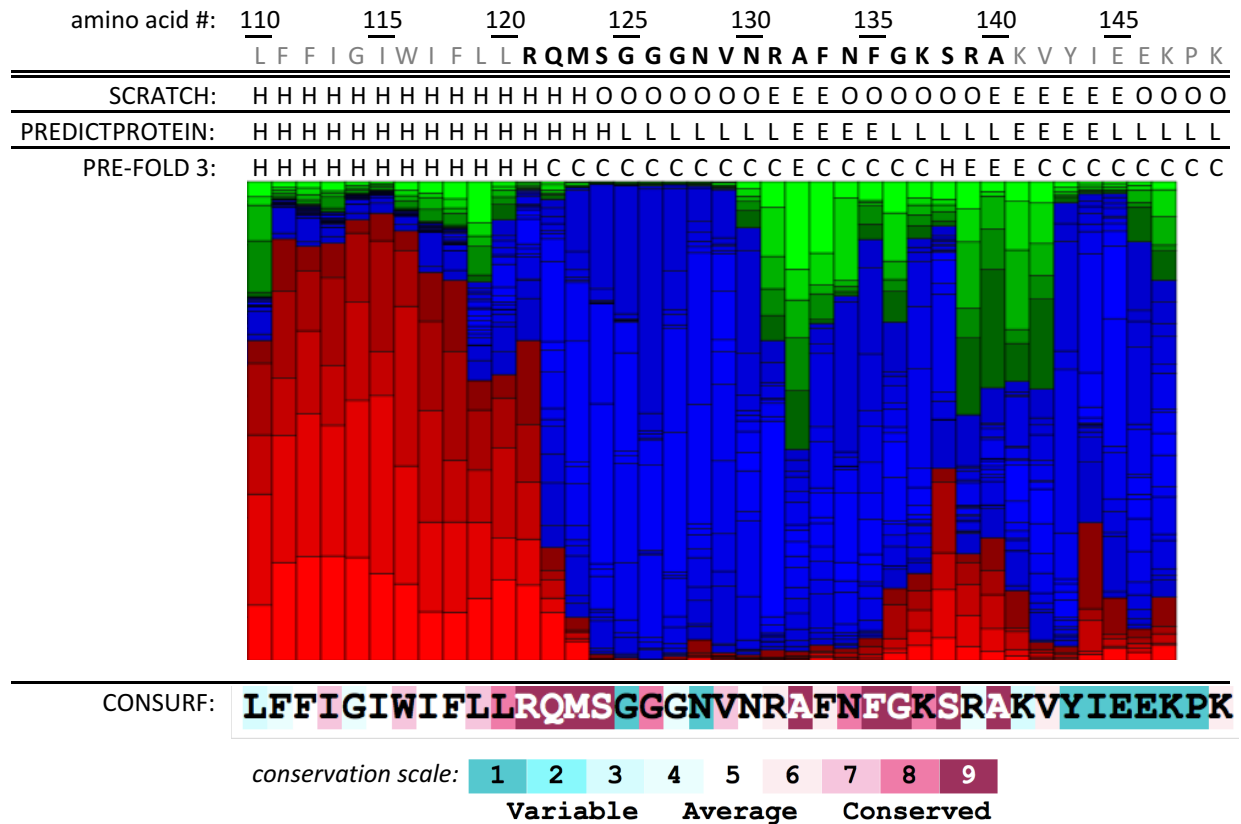

**Figure S7.** ~20 aa linker structure prediction. Structure of the ~20 aa region (amino acids in black) between the TM2 and the AAA-domain of *Aquifex aeolicus* FtsH, as predicted by the structure predictors SCRATCH, PREDICTPROTEIN and PRE-FOLD 3 (H: helical; E: extended; L: loop; C: coil; O: other). Residue conservation scores are obtained from the ConSurf server (scale at the bottom).

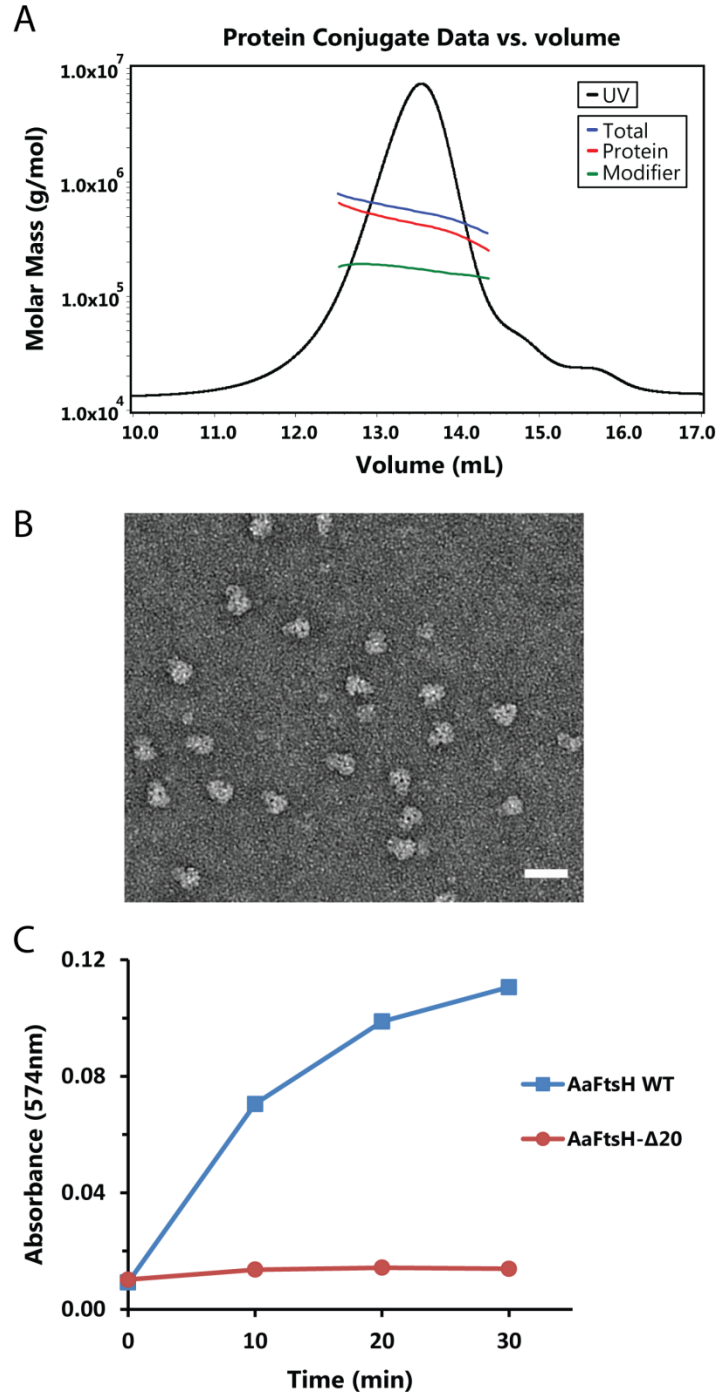

**Figure S8.** AaFtsH- $\Delta$ 20 mutant characterization. *A* – SEC-MALS analysis of AaFtsH- $\Delta$ 20. UV absorption chromatogram showing the distribution of the molar mass (g/mol) vs. retention volume (ml). The calculated molar masses of protein and detergent micelle are shown in supplementary Table S2. *B* – Negative stain EM of AaFtsH- $\Delta$ 20 showing the hexameric assembly (side views). Scale bar is 200 Å. *C* – Protease activity assays. Resorufin release was measured over the course of 30 minutes for 50  $\mu$ M of Resorufin labelled casein incubated with 1  $\mu$ M AaFtsH- $\Delta$ 20 mutant or AaFtsH wildtype.

**Table S1.** Data derived from SEC-MALS of AaFtsH

| <b>Peak</b>             | <b>1*</b>           | <b>2*</b>          |
|-------------------------|---------------------|--------------------|
| <b>Total MW (kDa)</b>   | <b>1096 ± 0.1 %</b> | <b>645 ± 0.2 %</b> |
| <b>Protein MW (kDa)</b> | <b>810 ± 0.4 %</b>  | <b>427 ± 0.5 %</b> |
| <b>Micelle MW (kDa)</b> | <b>286 ± 0.6 %</b>  | <b>218 ± 0.8 %</b> |

\*Peak definition in Figure S1.

**Table S2.** Data derived from SEC-MALS of AaFtsH-Δ20 mutant

|                         |                    |
|-------------------------|--------------------|
| <b>Total MW (kDa)</b>   | <b>602 ± 0.2 %</b> |
| <b>Protein MW (kDa)</b> | <b>416 ± 0.4 %</b> |
| <b>Micelle MW (kDa)</b> | <b>186 ± 0.4 %</b> |

**Table S3.** Primers used in this study

| <b>Primer</b>   | <b>Sequence 5'-3'</b>                                   |
|-----------------|---------------------------------------------------------|
| AaFtsH_Primer 1 | GATGAACATGCCCGTTACTGGAACGTTGTGAGGGTAAACA                |
| AaFtsH_Primer 2 | GGTTTTTCCTCTATGTAAACCTTGAGGAGGAATATCCATATACCGATA<br>AAG |
| AaFtsH_Primer 3 | TGTTTACCCTCACAACGTTCCAGTAACCGGGCATGTTTCATC              |
| AaFtsH_Primer 4 | CGGTATATGGATATTCTCTCTCAAGGTTTACATAGAGGAAAAACCG          |



**Table S4.** FtsH image acquisition and image processing

|                                              | <b>Hexamers</b>    |                    | <b>Dodecamers</b>  |                 |                 |                 |
|----------------------------------------------|--------------------|--------------------|--------------------|-----------------|-----------------|-----------------|
| Nominal magnification                        | 130000 x           |                    | 215000 x           |                 |                 |                 |
| Pixel size (Å)                               | 1.05               |                    | 0.64               |                 |                 |                 |
| Total dose (e <sup>-</sup> /Å <sup>2</sup> ) | 80                 |                    | 53                 |                 |                 |                 |
| Exposure time (s)                            | 12                 |                    | 7                  |                 |                 |                 |
| Frames per movie                             | 60                 |                    | 35                 |                 |                 |                 |
| Images acquired                              | 1371               |                    | 3993               |                 |                 |                 |
| Initially detected particles                 | 35048              |                    | 101726             |                 |                 |                 |
| Particles entering 3D classification         | 7635               |                    | 41818              |                 |                 |                 |
|                                              | <b>C6 symmetry</b> | <b>C1 symmetry</b> | <b>Intertwined</b> | <b>Lamellar</b> | <b>Touching</b> | <b>V-shaped</b> |
| Particles in final refinement                | 5649               | 2129               | 4351               | 2651            | 1722            | 3246            |
| Resolution in Å (FSC <sub>0.143</sub> )      | 6.6                | 15.9               | 17                 | 19.5            | 20.5            | 12.3            |

**Table S5.** Dimensions of FtsH subunit

| <b>Negative stain 2D class averages</b>        |          | <b>Cryo-EM 3D maps</b>            |
|------------------------------------------------|----------|-----------------------------------|
| <b>Dimensions of hexamers (Å) (SD, N=10)</b>   |          | <b>Hexamer in C6 symmetry (Å)</b> |
| Protein length                                 | 167 ± 5  | 134                               |
| Cytosolic domain height                        | 83 ± 7   | 78                                |
| Cytosolic domain width                         | 131 ± 7  | 140                               |
| Periplasmic domain height                      | 31 ± 3   | 28                                |
| Periplasmic domain width                       | 63 ± 6   | 80                                |
| Micelles thickness                             | 40 ± 4   | 40                                |
| Micelles width                                 | 100 ± 18 | 90                                |
| <b>Dimensions of dodecamers (Å) (SD, N=10)</b> |          | <b>Dodecamer</b>                  |
| Protein length                                 | 243 ± 8  | 290                               |
| Micelles thickness                             | 43 ± 2   | 40                                |
| Micelles width                                 | 126 ± 7  | 138                               |
